# Supplementary material for: The Role of Adjuvant Radiotherapy for the Treatment of Resected High-Risk Stage III Cutaneous Melanoma in the Era of Modern Systemic Therapies
Source: MDPI journal article supplement (doi:10.3390/cancers15245867), 2023-12-16
Supplement: s1 [file s1]

**Supplementary Tables for:**

# **The Role of Adjuvant Radiotherapy for the Treatment of Resected High-Risk Stage III Cutaneous Melanoma in the Era of Modern Systemic Therapies**

**Seth Kibel <sup>1,2,†</sup>, Nathan Kuehne <sup>1,2,†</sup>, Mauricio Fernando Ribeiro <sup>2</sup>, Thiago P. Muniz <sup>2</sup>, Xiang Y. Ye <sup>3</sup>, Anna Spreafico <sup>1,2</sup>, Samuel D. Saibil <sup>1,2</sup>, Alexander Sun <sup>4</sup>, David Y. Mak <sup>4</sup>, Diana Gray <sup>2</sup>, Bailie Jones <sup>2</sup>, Philip Wong <sup>4</sup> and Marcus O. Butler <sup>1,2,5,\*</sup>**

**Supplementary Table S1:** Demographic and clinical characteristics among patients who did not relapse within 90 days after CLD

**Supplementary Table S2:** Demographic and clinical factors by year of CLD

**Supplementary Figure S3:** Treatment and outcomes following LNB relapse

**Supplementary Table S4:** Univariate survival analysis for time from CLD to any relapse

**Supplementary Table S5:** Multivariate survival analysis for time from CLD to any relapse

**Supplementary Table S6:** Univariate survival analysis for overall survival (OS)

**Supplementary Table S7:** Multivariate survival analysis for overall survival (OS)

**Supplementary Table S1: Demographic and clinical characteristics among patients who did not relapse within 90 days after CLD**

|                                                        | Treatment Group    |                    |                     |                    | <i>P Value</i> |
|--------------------------------------------------------|--------------------|--------------------|---------------------|--------------------|----------------|
|                                                        | None<br>(N = 22)   | RT<br>(N = 48)     | ST only<br>(N = 21) | Total<br>(N = 91)  |                |
| <b>Sex</b>                                             |                    |                    |                     |                    |                |
| F                                                      | 9 (40.91%)         | 16 (33.33%)        | 4 (19.05%)          | 29 (31.87%)        | 0.29           |
| M                                                      | 13 (59.09%)        | 32 (66.67%)        | 17 (80.95%)         | 62 (68.13%)        |                |
| <b>Age at CLD</b>                                      |                    |                    |                     |                    |                |
| Median (Range)                                         | 68.7 (39.9 – 89.8) | 59.7 (23.6 – 83.8) | 59.2 (26.7 – 76.9)  | 62.6 (23.6 – 89.8) | 0.09           |
| <b>Primary Breslow's Depth (mm)</b>                    |                    |                    |                     |                    |                |
| Median (Range)                                         | 3.0 (0.4 – 13.0)   | 2.4 (0.6 – 12.0)   | 2.5 (0.4 – 21.0)    | 2.6 (0.4 – 21.0)   | 0.99           |
| <b>Melanoma Type</b>                                   |                    |                    |                     |                    |                |
| Nodular                                                | 6 (28.57%)         | 7 (17.07%)         | 3 (15.00%)          | 16 (19.51%)        | 0.09           |
| Superficial spreading                                  | 3 (13.64%)         | 6 (12.50%)         | 4 (19.05%)          | 13 (14.29%)        |                |
| Other                                                  | 9 (42.86%)         | 12 (29.27%)        | 2 (10.00%)          | 23 (28.05%)        |                |
| Primary not found                                      | 3 (14.29%)         | 16 (39.02%)        | 11 (55.00%)         | 30 (36.59%)        |                |
| <b>Location of Primary</b>                             |                    |                    |                     |                    |                |
| Head/neck                                              | 10 (45.45%)        | 12 (25.00%)        | 4 (19.05%)          | 26 (28.57%)        | 0.15           |
| Lower extremity                                        | 5 (22.73%)         | 6 (12.50%)         | 2 (9.52%)           | 13 (14.29%)        |                |
| Trunk                                                  | 2 (9.09%)          | 9 (18.75%)         | 1 (4.76%)           | 12 (13.19%)        |                |
| Upper extremity                                        | 2 (9.09%)          | 5 (10.42%)         | 3 (14.29%)          | 10 (10.99%)        |                |
| Primary not found                                      | 3 (13.64%)         | 16 (33.33%)        | 11 (52.38%)         | 30 (32.97%)        |                |
| <b>Ulceration of Primary</b>                           |                    |                    |                     |                    |                |
| Not Ulcerated                                          | 9 (45.00%)         | 16 (38.10%)        | 7 (33.33%)          | 32 (38.55%)        | 0.13           |
| Ulcerated                                              | 8 (40.00%)         | 10 (23.81%)        | 3 (14.29%)          | 21 (25.30%)        |                |
| Primary not found                                      | 3 (15.00%)         | 16 (38.10%)        | 11 (52.38%)         | 30 (36.14%)        |                |
| <b>Affected LN Location</b>                            |                    |                    |                     |                    |                |
| Axilla                                                 | 6 (27.27%)         | 20 (41.67%)        | 9 (42.86%)          | 35 (38.46%)        | 0.72           |
| Cervical/parotid                                       | 10 (45.45%)        | 20 (41.67%)        | 9 (42.86%)          | 39 (42.86%)        |                |
| Groin/Inguinal                                         | 6 (27.27%)         | 8 (16.67%)         | 3 (14.29%)          | 17 (18.68%)        |                |
| <b>Mutation Status</b>                                 |                    |                    |                     |                    |                |
| BRAF                                                   | 6 (31.58%)         | 16 (35.56%)        | 10 (50.00%)         | 32 (38.10%)        | 0.29           |
| Other                                                  | 4 (21.05%)         | 8 (17.78%)         | 6 (30.00%)          | 18 (21.43%)        |                |
| None                                                   | 9 (47.37%)         | 21 (46.67%)        | 4 (20.00%)          | 34 (40.48%)        |                |
| <b>Affected LN Number</b>                              |                    |                    |                     |                    |                |
| Median (Range)                                         | 2.0 (1.0 – 12.0)   | 2.0 (1.0 – 32.0)   | 2.0 (1.0 – 28.0)    | 2.0 (1.0 – 32.0)   | 0.19           |
| <b>Largest Affected LN (mm)</b>                        |                    |                    |                     |                    |                |
| Median (Range)                                         | 26.0 (12.0 – 90.0) | 38.0 (4.0 – 90.0)  | 44.0 (12.0 – 90.0)  | 34.5 (4.0 – 90.0)  | <b>0.044</b>   |
| <b>LN Extranodal Extension</b>                         |                    |                    |                     |                    |                |
| Absent                                                 | 13 (76.47%)        | 27 (67.50%)        | 10 (55.56%)         | 50 (66.67%)        | 0.42           |
| Present                                                | 4 (23.53%)         | 13 (32.50%)        | 8 (44.44%)          | 25 (33.33%)        |                |
| <b>ST Type</b>                                         |                    |                    |                     |                    |                |
| None                                                   |                    |                    | 0 (0.00%)           |                    |                |
| Dabrafenib and Trametinib                              |                    |                    | 2 (9.52%)           |                    |                |
| Interferon                                             |                    |                    | 0 (0.00%)           |                    |                |
| Ipilimumab                                             |                    |                    | 2 (9.52%)           |                    |                |
| Nivolumab                                              |                    |                    | 5 (23.81%)          |                    |                |
| Pembrolizumab                                          |                    |                    | 4 (19.05%)          |                    |                |
| Nivolumab +/- Ipilimumab                               |                    |                    | 8 (38.10%)          |                    |                |
| <b>Time from CLD to LN relapse, or last follow-up</b>  |                    |                    |                     |                    |                |
| Median (Range)                                         | 1.9 (0.3 – 7.3)    | 3.9 (0.3 – 10.3)   | 3.6 (0.4 – 6.3)     | 3.6 (0.3 – 10.3)   | 0.07           |
| <b>Time from CLD to Death, or last follow-up</b>       |                    |                    |                     |                    |                |
| Median (Range)                                         | 3.5 (0.3 – 7.3)    | 4.4 (0.5 – 10.3)   | 4.2 (1.3 – 6.3)     | 4.0 (0.3 – 10.3)   | 0.13           |
| <b>Time from CLD to any relapse, or last follow-up</b> |                    |                    |                     |                    |                |
| Median (Range)                                         | 1.3 (0.3 – 7.3)    | 1.8 (0.3 – 10.3)   | 3.6 (0.4 – 6.3)     | 2.2 (0.3 – 10.3)   | 0.26           |

**Supplementary Table S2: Demographic and clinical factors by year of CLD**

|                                     | <i>Time period</i>                    |                                       | <i>P Value</i> |
|-------------------------------------|---------------------------------------|---------------------------------------|----------------|
|                                     | <i>2010-2014</i><br>( <i>N = 60</i> ) | <i>2015-2019</i><br>( <i>N = 48</i> ) |                |
| <b>Sex</b>                          |                                       |                                       |                |
| F                                   | 18 (30.00%)                           | 16 (33.33%)                           | 0.71           |
| M                                   | 42 (70.00%)                           | 32 (66.67%)                           |                |
| <b>Age at CLD</b>                   |                                       |                                       |                |
| Median (Range)                      | 58.5 (23.6 – 85.9)                    | 59.1 (36.1 – 89.8)                    | 0.48           |
| <b>Primary Breslow's Depth (mm)</b> |                                       |                                       |                |
| Median (Range)                      | 2.4 (0.4 – 45.0)                      | 2.8 (0.4 – 14.0)                      | 0.45           |
| <b>Melanoma Type</b>                |                                       |                                       |                |
| Nodular                             | 6 (11.54%)                            | 12 (27.27%)                           | 0.06           |
| Superficial spreading               | 13 (25.00%)                           | 4 (9.09%)                             |                |
| Other                               | 17 (32.69%)                           | 10 (22.73%)                           |                |
| Primary not found                   | 16 (30.77%)                           | 18 (40.91%)                           |                |
| <b>Location of Primary</b>          |                                       |                                       |                |
| Head/neck                           | 22 (36.67%)                           | 9 (18.75%)                            | 0.33           |
| Lower extremity                     | 8 (13.33%)                            | 8 (16.67%)                            |                |
| Trunk                               | 9 (15.00%)                            | 7 (14.58%)                            |                |
| Upper extremity                     | 5 (8.33%)                             | 6 (12.50%)                            |                |
| Primary not found                   | 16 (26.67%)                           | 18 (37.50%)                           |                |
| <b>Ulceration of Primary</b>        |                                       |                                       |                |
| Not Ulcerated                       | 22 (43.14%)                           | 15 (32.61%)                           | 0.55           |
| Ulcerated                           | 13 (25.49%)                           | 13 (28.26%)                           |                |
| Primary not found                   | 16 (31.37%)                           | 18 (39.13%)                           |                |
| <b>Affected LN Location</b>         |                                       |                                       |                |
| Axilla                              | 21 (35.00%)                           | 20 (41.67%)                           | 0.18           |
| Cervical/parotid                    | 30 (50.00%)                           | 16 (33.33%)                           |                |
| Groin/Inguinal                      | 9 (15.00%)                            | 12 (25.00%)                           |                |
| <b>Mutation group</b>               |                                       |                                       |                |
| BRAF                                | 22 (40.00%)                           | 16 (34.78%)                           | 0.15           |
| None                                | 26 (47.27%)                           | 17 (36.96%)                           |                |
| Other                               | 7 (12.73%)                            | 13 (28.26%)                           |                |
| <b>Affected LN Number</b>           |                                       |                                       |                |
| Median (Range)                      | 2.0 (1.0 – 32.0)                      | 2.0 (1.0 – 28.0)                      | 0.48           |
| <b>Largest Affected LN (mm)</b>     |                                       |                                       |                |
| Median (Range)                      | 35.0 (4.0 – 90.0)                     | 35.5 (1.5 – 90.0)                     | 0.52           |
| <b>LN Extranodal Extension</b>      |                                       |                                       |                |
| Absent                              | 35 (70.00%)                           | 21 (55.26%)                           | 0.15           |
| Present                             | 15 (30.00%)                           | 17 (44.74%)                           |                |

**Supplementary Table S3: Treatment and outcomes following LNB relapse**

| Adjuvant Treatment Group | Relation to progression to stage IV    | Location of Relapse | Time from CLD to recurrence (days) | Treatment                                               | Outcome                                                                                      |
|--------------------------|----------------------------------------|---------------------|------------------------------------|---------------------------------------------------------|----------------------------------------------------------------------------------------------|
| ST only (ipilimumab)     | LNBr first                             | Right neck          | 140                                | Repeat lymph node dissection, repeat ipilimumab therapy | Two years disease free until distant progression as well as right cervical LN recurrence     |
| ST only (nivolumab)      | LNBr only                              | Right axilla        | 673                                | Repeat lymph node dissection, start targeted therapy    | No subsequent disease progression                                                            |
| RT only                  | Synchronously with distant progression | Left neck           | 342                                | Initiation of ipilimumab                                | Complete response to ipilimumab                                                              |
| RT only                  | LNBr first                             | Right parotid       | 390                                | Surgical re-excision                                    | One year disease free until distant progression. No subsequent local or regional recurrence. |
| RT only                  | Synchronously with distant progression | Left axilla         | 117                                | Treatment with vemurafenib                              | Complete response to vemurafenib                                                             |

**Supplementary Table S4: Univariate survival analysis for time from CLD to any relapse**

| Covariate                   | Level                 | N  | Hazard Ratio (95% CI) | HR P-value   |
|-----------------------------|-----------------------|----|-----------------------|--------------|
| <b>Treatment</b>            | None                  | 22 | Reference             | -            |
|                             | RT                    | 48 | 0.93 (0.47-1.84)      | 0.83         |
|                             | ST only               | 21 | 0.33 (0.12-0.95)      | <b>0.039</b> |
| <b>Sex</b>                  | F                     | 29 | Reference             | -            |
|                             | M                     | 62 | 0.89 (0.48-1.66)      | 0.713        |
| <b>Melanoma Type</b>        | Superficial spreading | 13 | Reference             | -            |
|                             | Nodular               | 16 | 2.18 (0.82-5.85)      | 0.120        |
|                             | Other                 | 23 | 1.64 (0.64-4.20)      | 0.298        |
|                             | Primary not found     | 30 | 0.59 (0.22-1.59)      | 0.297        |
| <b>Ulceration Status</b>    | Not Ulcerated         | 32 | Reference             | -            |
|                             | Ulcerated             | 21 | 2.07 (1.03-4.17)      | <b>0.044</b> |
|                             | Primary not found     | 30 | 0.50 (0.22-1.11)      | 0.088        |
| <b>Affected LN Location</b> | Axilla                | 35 | Reference             | -            |
|                             | Cervical/parotid      | 39 | 1.29 (0.66-2.51)      | 0.462        |
|                             | Groin/Inguinal        | 17 | 1.68 (0.78-3.63)      | 0.187        |
| <b>Mutation Status</b>      | None                  | 34 | Reference             | -            |
|                             | BRAF                  | 32 | 0.81 (0.43-1.52)      | 0.506        |
|                             | other                 | 18 | 0.48 (0.19-1.24)      | 0.129        |
| <b>Age at CLD</b>           |                       | 91 | 1.03 (1.00-1.06)      | 0.063        |

|                                     |  |    |                  |                  |
|-------------------------------------|--|----|------------------|------------------|
| <b>Primary Breslow's Depth (mm)</b> |  | 57 | 1.06 (0.97-1.17) | 0.194            |
| <b>Affected LN Number</b>           |  | 90 | 1.05 (1.02-1.07) | <b>&lt;0.001</b> |
| <b>Largest Affected LN (mm)</b>     |  | 82 | 0.99 (0.98-1.01) | 0.394            |

**Supplementary Table S5: Multivariable survival analysis for time from CLD to any relapse**

| <b>Covariate</b>          | <b>Level</b>      | <b>N</b> | <b>Hazard Ratio (95% CI)</b> | <b>HR P-value</b> | <b>Type3 P-value</b> |
|---------------------------|-------------------|----------|------------------------------|-------------------|----------------------|
| <b>Treatment</b>          | None              | 20       | Reference                    | -                 | 0.111                |
|                           | RT                | 41       | 0.99 (0.46-2.10)             | 0.97              |                      |
|                           | ST only           | 21       | 0.39 (0.13-1.12)             | 0.080             |                      |
| <b>Ulceration Status</b>  | Not Ulcerated     | 32       | Reference                    | -                 | <b>0.009</b>         |
|                           | Ulcerated         | 21       | 2.09 (1.03-4.23)             | <b>0.042</b>      |                      |
|                           | Primary not found | 29       | 0.59 (0.27-1.31)             | 0.196             |                      |
| <b>Affected LN Number</b> |                   | 82       | 1.05 (1.02-1.09)             | <b>0.005</b>      | <b>0.005</b>         |

Number of observations used = 82. Backward selection with an alpha level of removal of 0.05 was used. The following variables were forced in the model: Treatment. The following variables were removed from the model: Age at CLD. In pairwise comparisons, the HR (ST only vs RT) was significantly less 1 ( $p = 0.032$ ), with no significant difference between ST only and None groups.

**Supplementary Table S6: Univariate survival analysis for overall survival (OS)**

| Covariate                    | Level                 | N  | Hazard Ratio (95% CI) | HR P-value | Log-rank P-value |
|------------------------------|-----------------------|----|-----------------------|------------|------------------|
| Treatment                    | None                  | 22 | Reference             | -          | 0.191            |
|                              | RT                    | 48 | 0.67 (0.26-1.71)      | 0.398      |                  |
|                              | ST only               | 21 | 0.25 (0.05-1.22)      | 0.086      |                  |
| Sex                          | F                     | 29 | Reference             | -          | 0.976            |
|                              | M                     | 62 | 0.99 (0.40-2.45)      | 0.976      |                  |
| Melanoma Type                | Superficial spreading | 13 | Reference             | -          | 0.055            |
|                              | Nodular               | 16 | 2.54 (0.65-9.835)     | 0.179      |                  |
|                              | Other                 | 23 | 1.30 (0.34-5.06)      | 0.700      |                  |
|                              | Primary not found     | 30 | 0.52 (0.12-2.31)      | 0.387      |                  |
| Ulceration Status            | Not Ulcerated         | 32 | Reference             | -          | <0.001           |
|                              | Ulcerated             | 21 | 4.27 (1.57-11.61)     | 0.004      |                  |
|                              | Primary not found     | 30 | 0.68 (0.19-2.43)      | 0.557      |                  |
| Affected LN Location         | Axilla                | 35 | Reference             | -          | 0.067            |
|                              | Cervical/parotid      | 39 | 2.63 (0.84-8.29)      | 0.098      |                  |
|                              | Groin/Inguinal        | 17 | 4.12 (1.16-14.67)     | 0.029      |                  |
| Mutation Status              | None                  | 34 | Reference             | -          | 0.507            |
|                              | BRAF                  | 32 | 1.61 (0.61-4.26)      | 0.34       |                  |
|                              | Other                 | 18 | 0.92 (0.27-3.15)      | 0.894      |                  |
| Age at CLD                   |                       | 91 | 1.02 (0.99-1.05)      | 0.194      | -                |
| Primary Breslow's Depth (mm) |                       | 57 | 1.15 (1.05-1.25)      | 0.002      | -                |
| Affected LN Number           |                       | 90 | 1.02 (0.95-1.10)      | 0.516      | -                |
| Largest Affected LN (mm)     |                       | 82 | 0.99 (0.97-1.01)      | 0.543      | -                |

**Supplementary Table S7: Multivariate survival analysis for overall survival (OS)**

| Covariate                    | Level             | N  | Hazard Ratio<br>(95% CI) | HR P-value   | Type3<br>P-value |
|------------------------------|-------------------|----|--------------------------|--------------|------------------|
| <b>Treatment</b>             | None              | 20 | Reference                | -            | 0.386            |
|                              | RT                | 42 | 0.96 (0.36-2.54)         | 0.927        |                  |
|                              | ST only           | 21 | 0.34 (0.07-1.72)         | 0.194        |                  |
| <b>Ulceration<br/>Status</b> | Not Ulcerated     | 32 | Reference                | -            | <b>0.003</b>     |
|                              | Ulcerated         | 21 | 4.22 (1.54-11.62)        | <b>0.005</b> |                  |
|                              | Primary not found | 30 | 0.81 (0.22-2.91)         | 0.744        |                  |

Number of observations used = 83. This final model was derived by backward variables selection procedure with variable stay criterion of  $p < 0.05$ , where treatment was forced in the model. The variables included in the full model were treatment, Melanoma type, Ulceration status, Affected LN location. Primary Breslow's Depth was significantly associated with the OS in the subpopulation of patients where Primary Breslow's Depth was assessable.
